# Supplementary figures and images for: Peripancreatic fat necrosis worsens acute pancreatitis independent of pancreatic necrosis via unsaturated fatty acids increased in human pancreatic necrosis collections
Source: HighWire-hosted journal article supplement (doi:10.1136/gutjnl-2014-308043), 2014-12-10

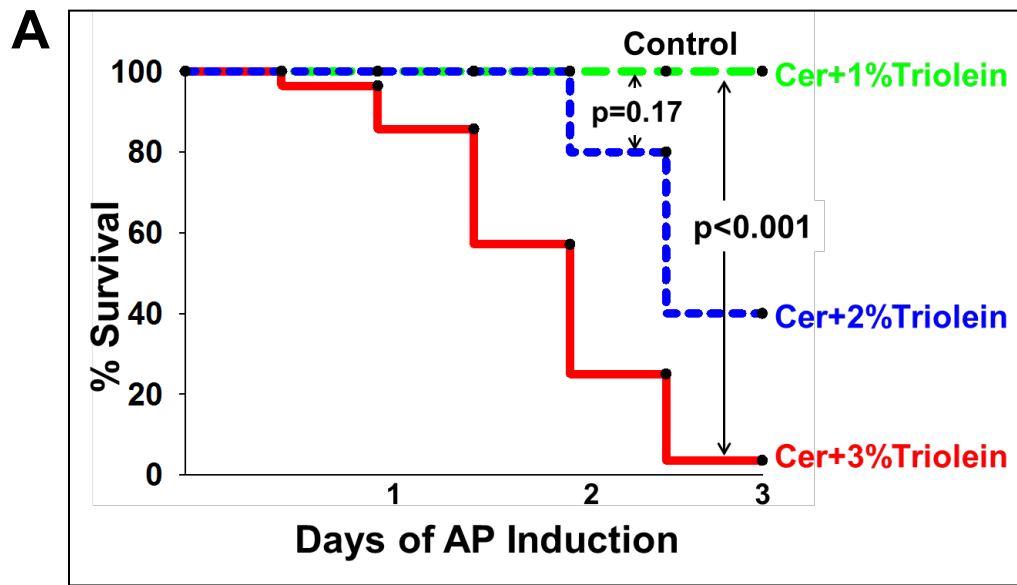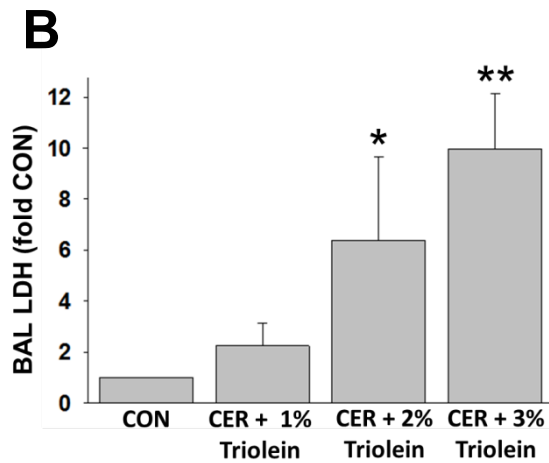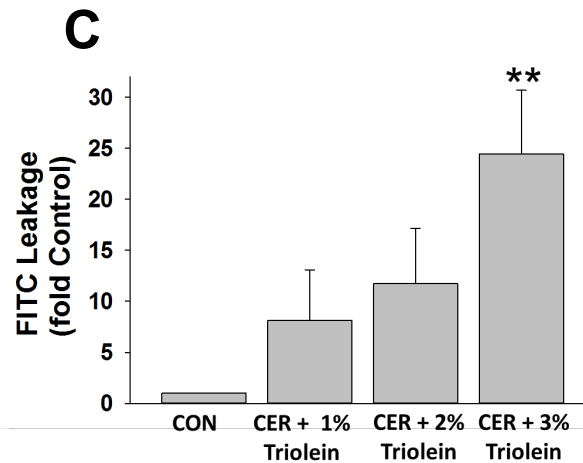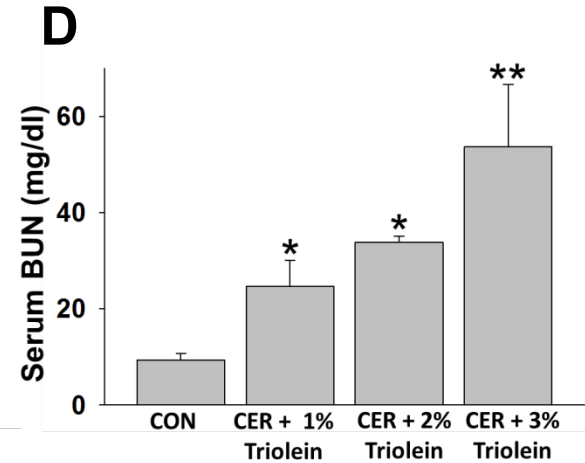

Supplementary Figure 3

Supplement: gutjnl-2014-308043supp_figure3.pdf [file gutjnl-2014-308043supp_figure3.pdf]
